# Supplementary material for: Characteristics, Secondary Transformation Potential and Health Risks of Atmospheric Volatile Organic Compounds in an Industrial Area in Zibo, East China
Source: MDPI journal article supplement (doi:10.3390/atmos14010158), 2023-01-10
Supplement: s1 [file s1]

**Table S1** Concentrations of each VOC species at DZ and SS sites in Zibo (unit:ppb)

| Group     | component              | Sampling sites |       |
|-----------|------------------------|----------------|-------|
|           |                        | DZ             | SS    |
| Alkanes   | ethane                 | 6.47           | 6.14  |
|           | propane                | 6.48           | 8.97  |
|           | isobutane              | 0.74           | 0.68  |
|           | butane                 | 1.30           | 1.19  |
|           | isopentane             | 1.23           | 1.72  |
|           | pentane                | 1.31           | 2.19  |
|           | cyclohexane            | 0.301          | 0.70  |
|           | n-hexane               | 1.17           | 1.22  |
|           | 2,3-dimethylbutane     | 0.22           | 0.13  |
|           | 3-methylpentane        | 0.19           | 0.11  |
|           | methylcyclohexane      | 0.21           | 0.89  |
|           | 2,4-dimethylpentane    | 0.01           | 0.006 |
|           | heptane                | 0.02           | 0.17  |
|           | 2,3,4-trimethylpentane | 0.096          | 0.09  |
|           | 3-methylheptane        | 0.074          | 0.07  |
|           | octane                 | 0.299          | 0.29  |
|           | decane                 | 0.22           | 0.22  |
|           | undecane               | 0.97           | 0.97  |
|           | dodecane               | 0.88           | 1.03  |
| Alkenes   | ethylene               | 3.85           | 3.21  |
|           | propene                | 1.49           | 5.8   |
|           | 1,3-butadiene          | 1.82           | 1.28  |
|           | 1-butene               | 0.41           | 0.83  |
|           | 2-butene               | 0.069          | 0.05  |
|           | isoprene               | 0.15           | 0.15  |
|           | 1-pentene              | 0.057          | 0.05  |
|           | 1-hexene               | 0.33           | 0.18  |
| Aromatics | benzene                | 1.32           | 0.99  |
|           | toluene                | 1.24           | 1.26  |
|           | styrene                | 0.77           | 0.78  |
|           | m/p-xylene             | 0.77           | 0.72  |
|           | ethylbenzene           | 0.59           | 0.59  |
|           | o-xylene               | 0.18           | 0.18  |
|           | 1,2,3-trimethylbenzene | 0.66           | 0.66  |
|           | 1,2,4-trimethylbenzene | 0.31           | 0.31  |
|           | isopropylbenzene       | 0.43           | 0.43  |

|                  |                      |        |        |
|------------------|----------------------|--------|--------|
|                  | n-propylbenzene      | 0.58   | 0.58   |
|                  | 3-ethyltoluene       | 0.51   | 0.51   |
|                  | 2-ethyltoluene       | 0.26   | 0.26   |
|                  | 1,2-diethylbenzene   | 0.58   | 0.38   |
|                  | m-diethylbenzene     | 0.71   | 0.71   |
|                  | 1,4-diethylbenzene   | 0.70   | 0.70   |
| Halohydrocarbons | Freon-11             | 0.28   | 0.24   |
|                  | dichloromethane      | 4.12   | 17.16  |
|                  | 1,1-dichloroethane   | 0.30   | 0.33   |
|                  | chloroform           | 0.32   | 0.93   |
|                  | 1,2-dichloroethane   | 0.85   | 0.79   |
|                  | 1,2-dichloropropane  | 0.89   | 0.94   |
|                  | vinyl chloride       | 8.01   | 3.57   |
|                  | carbon tetrachloride | 0.45   | 0.38   |
| OVOCs            | formaldehyde         | 2.26   | 2.20   |
|                  | acetaldehyde         | 4.02   | 4.23   |
|                  | propanal             | 13.56  | 18.61  |
|                  | acrolein             | 1.82   | 2.45   |
|                  | butenal              | 2.01   | 2.10   |
|                  | butanal              | 2.21   | 2.4    |
|                  | pentanal             | 1.94   | 1.96   |
|                  | hexanal              | 2.10   | 2.12   |
|                  | methacrolein         | 1.97   | 1.98   |
|                  | benzaldehyde         | 2.84   | 2.88   |
|                  | m-methylbenzaldehyde | 1.12   | 1.19   |
|                  | acetone              | 2.88   | 4.33   |
|                  | 2-butanone           | 0.78   | 0.76   |
|                  | cyclopentanone       | 0.34   | 0.34   |
|                  | 3-pentanone          | 0.33   | 0.36   |
|                  | ethanol              | 6.75   | 5.96   |
|                  | iso-propanol         | 0.94   | 0.73   |
|                  | 1-propanol           | 0.38   | 0.42   |
|                  | 1-butanol            | 0.78   | 1.21   |
|                  | vinyl acetate        | 1.33   | 1.28   |
|                  | ethyl acetate        | 1.25   | 1.78   |
|                  | propyl acetate       | 0.33   | 0.34   |
| Others           | acrylonitrile        | 0.25   | 0.21   |
|                  | acetonitrile         | 2.21   | 4.46   |
|                  | carbon disulfide     | 0.55   | 0.53   |
|                  | acetylene            | 2.29   | 2.00   |
|                  | naphthalene          | 0.60   | 0.58   |
| TVOC             |                      | 113.12 | 139.40 |

**Table S2** Top 10 VOCs contributed to  $L_{OH}$  and OFP at DZ and SS sites.

| Period                 | Rank | Species      | $L_{OH}$ ( $s^{-1}$ ) | Species                | OFP ( $\mu g/m^3$ ) |
|------------------------|------|--------------|-----------------------|------------------------|---------------------|
| DongZhang<br>community | 1    | propanal     | 6.67                  | propanal               | 248.66              |
|                        | 2    | butadiene    | 2.99                  | vinyl chloride         | 62.72               |
|                        | 3    | hexanal      | 1.55                  | butenal                | 58.87               |
|                        | 4    | acetaldehyde | 1.49                  | butadiene              | 55.49               |
|                        | 5    | pentanal     | 1.33                  | acetaldehyde           | 51.71               |
|                        | 6    | butanal      | 1.31                  | ethylene               | 43.29               |
|                        | 7    | styrene      | 1.10                  | 1,2,3-trimethylbenzene | 42.64               |
|                        | 8    | propene      | 0.97                  | butanal                | 42.50               |
|                        | 9    | benzaldehyde | 0.84                  | hexanal                | 40.83               |
|                        | 10   | ethylene     | 0.81                  | pentanal               | 37.78               |
|                        | Sum  |              | 19.06                 |                        | 684.49              |
| Special<br>school      | 1    | propanal     | 9.16                  | propanal               | 341.19              |
|                        | 2    | propene      | 3.76                  | propene                | 127.52              |
|                        | 3    | butadiene    | 2.11                  | butenal                | 61.72               |
|                        | 4    | hexanal      | 1.57                  | acetaldehyde           | 54.43               |
|                        | 5    | acetaldehyde | 1.56                  | butanal                | 46.28               |
|                        | 6    | butanal      | 1.42                  | acrolein               | 45.64               |
|                        | 7    | pentanal     | 1.35                  | 1,2,3-trimethylbenzene | 42.63               |
|                        | 8    | styrene      | 1.11                  | hexanal                | 41.19               |
|                        | 9    | benzaldehyde | 0.85                  | butadiene              | 39.17               |
|                        | 10   | ethylene     | 0.67                  | pentanal               | 38.24               |
|                        | Sum  |              | 23.56                 |                        | 838.01              |

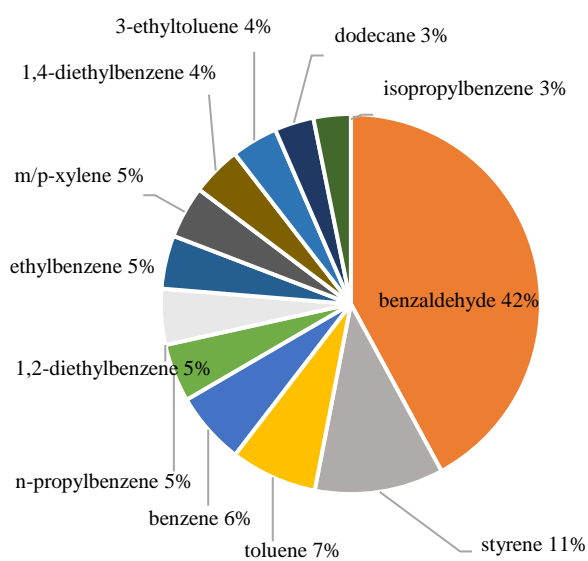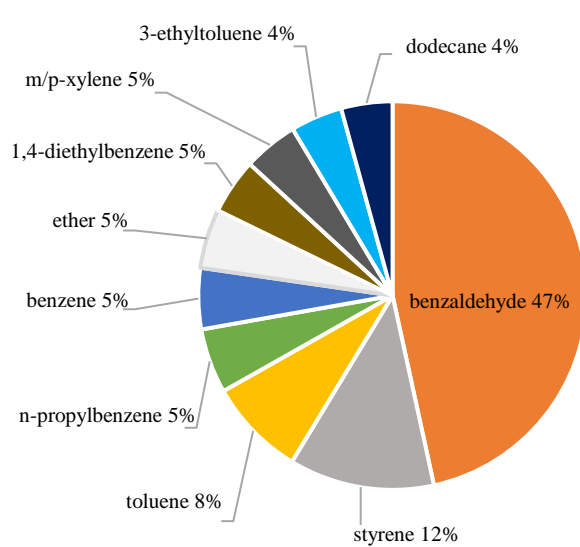

**Figure S1.** Contributions of the top 10 VOCs to the total SOAP at DZ and SS sites.
